# Supplementary material for: m6A-immune-related lncRNA prognostic signature for predicting immune landscape and prognosis of bladder cancer
Source: Springer Nature journal article supplement (doi:10.1186/s12967-022-03711-1), 2022-10-29

Figure S1

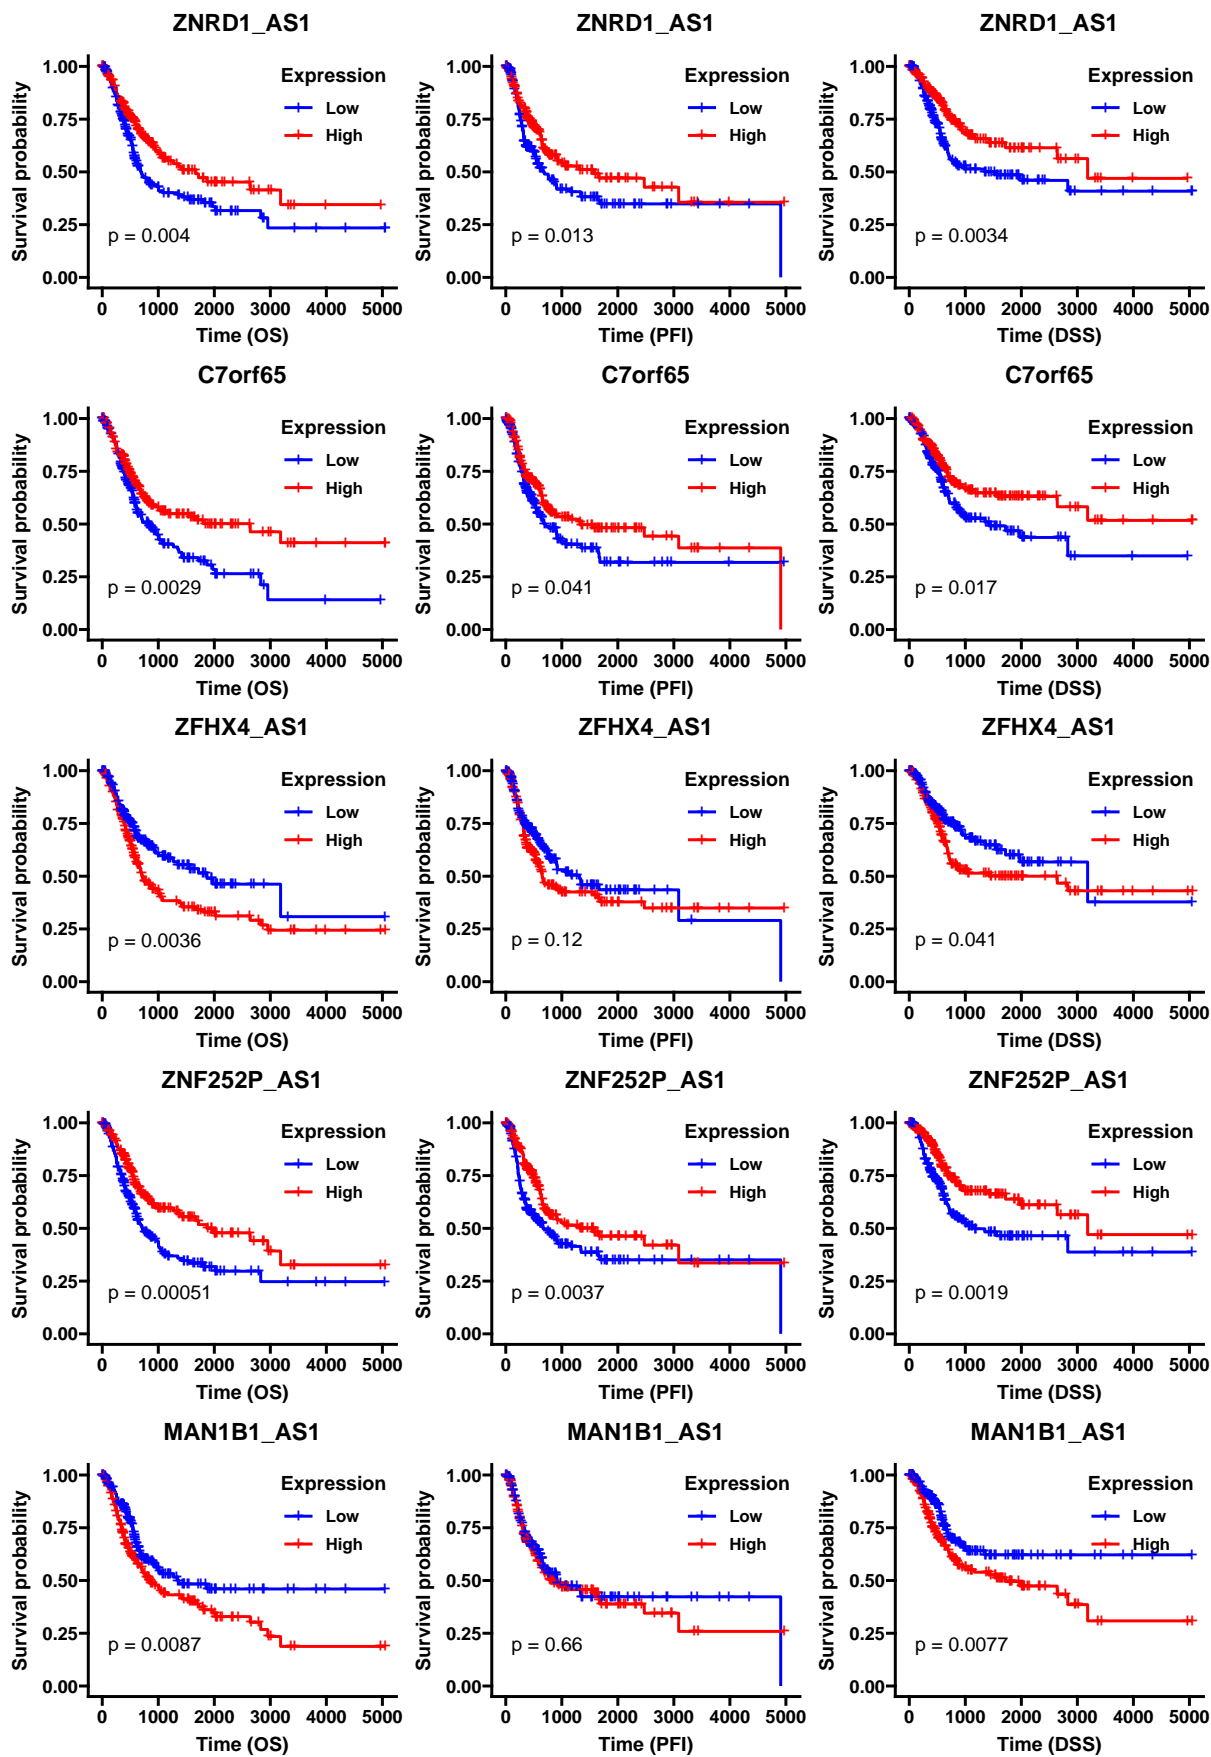

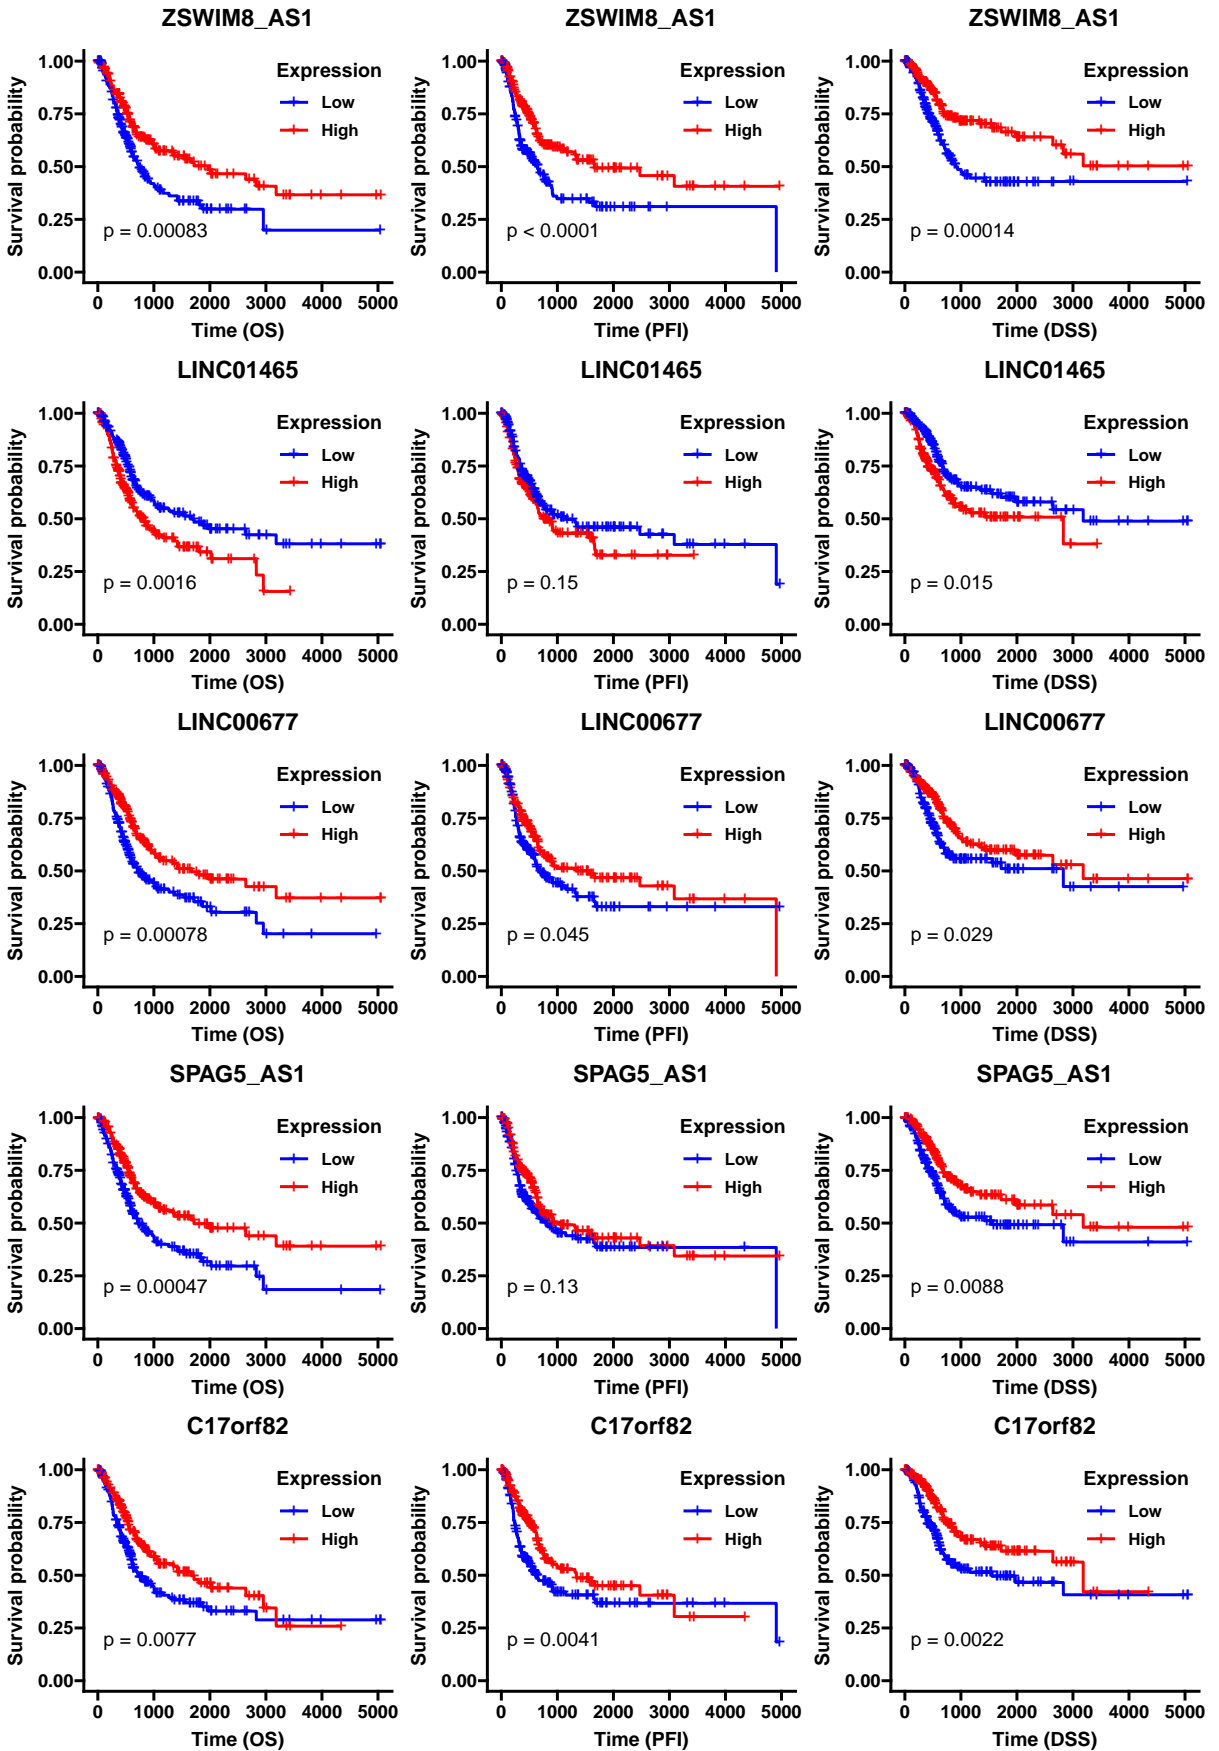

TTC28\_AS1

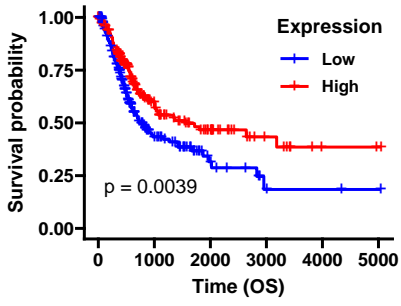

TTC28\_AS1

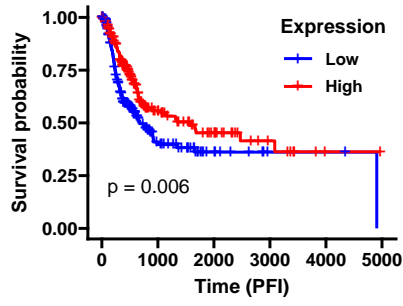

TTC28\_AS1

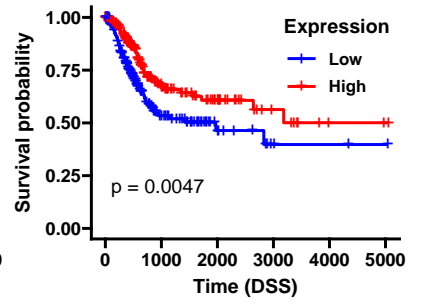

Figure S2

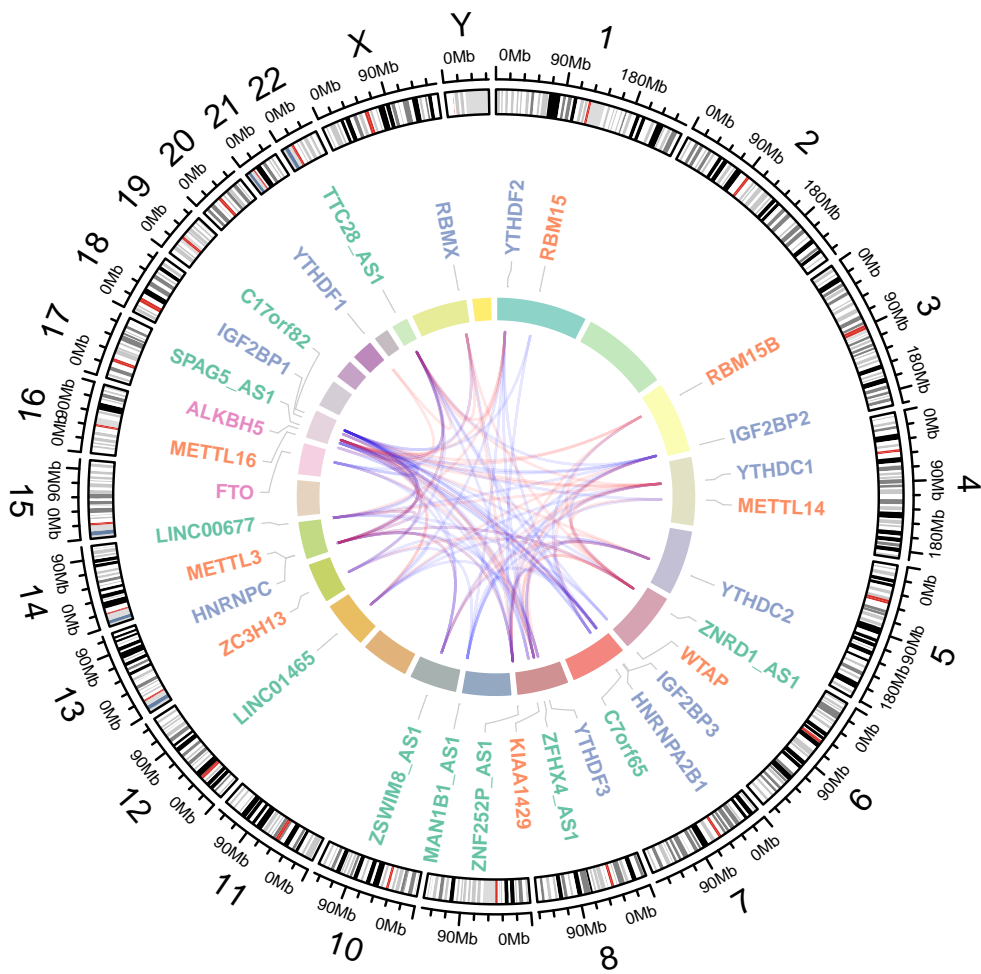

Figure S3

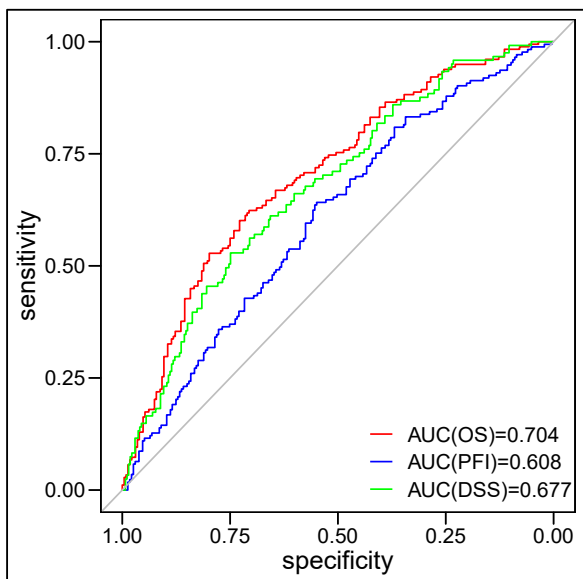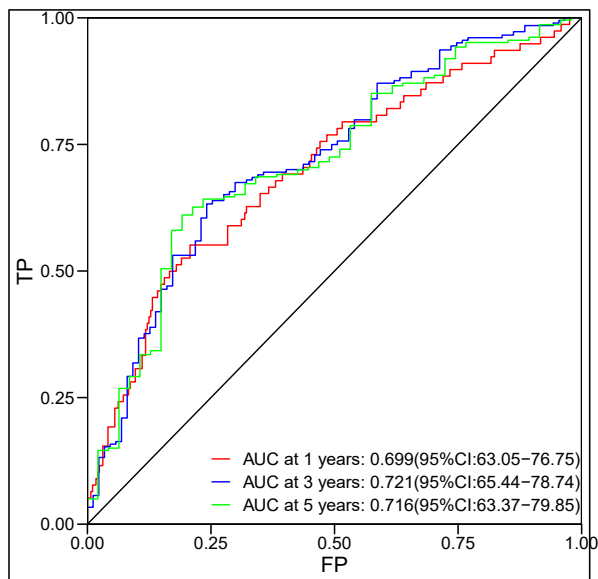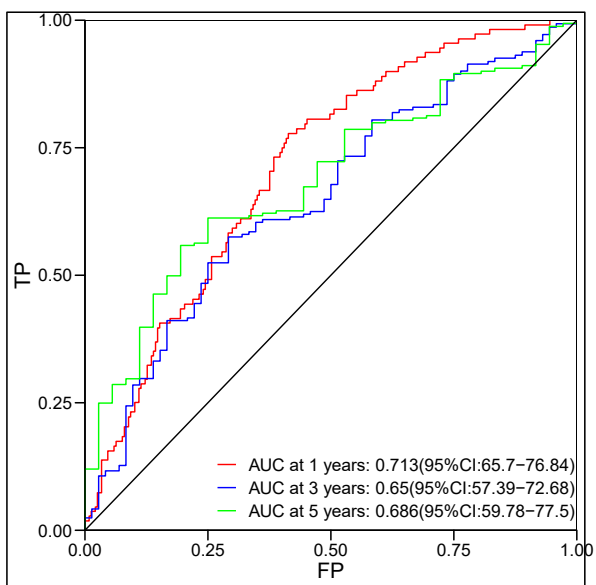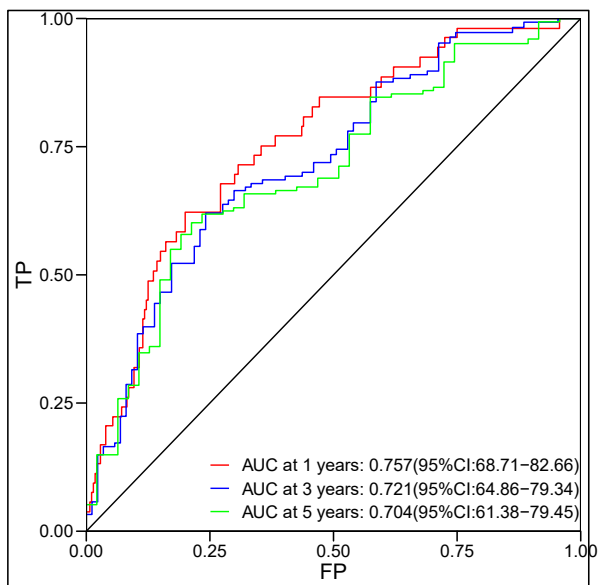

Figure S4

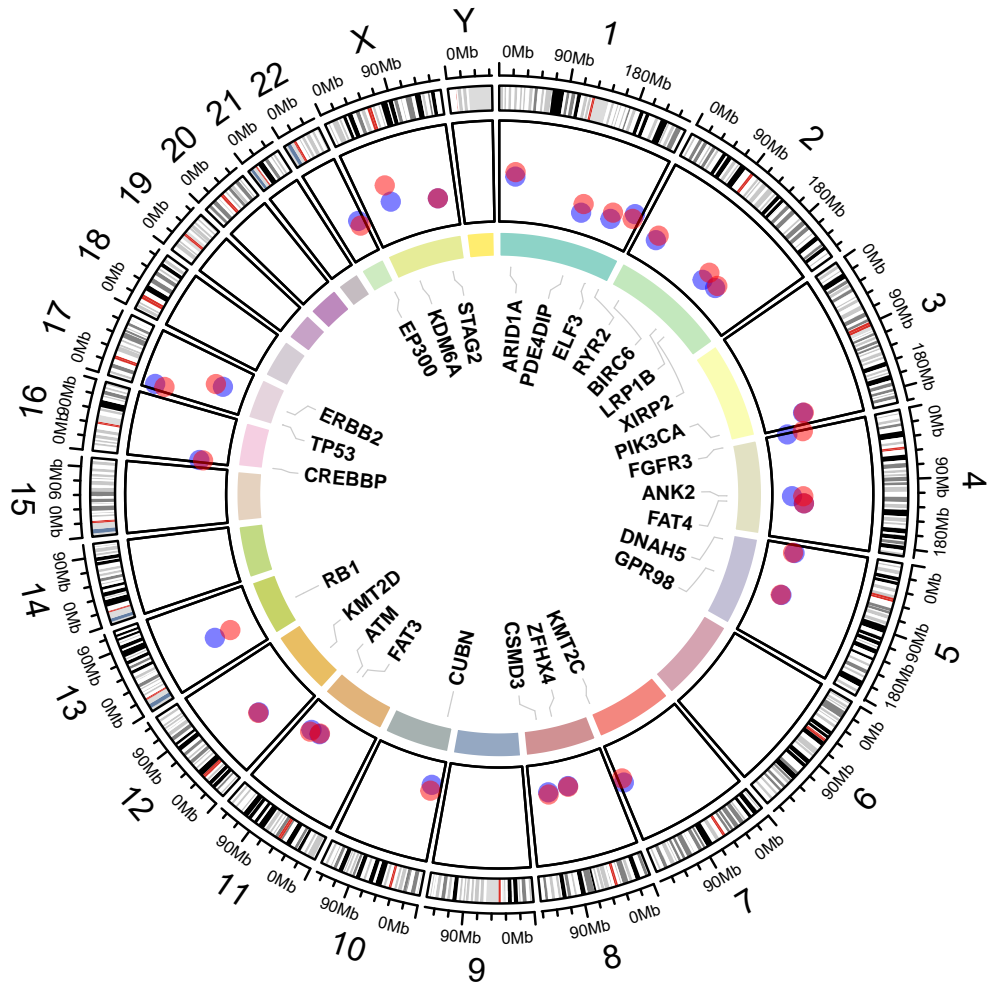

**Figure S5**

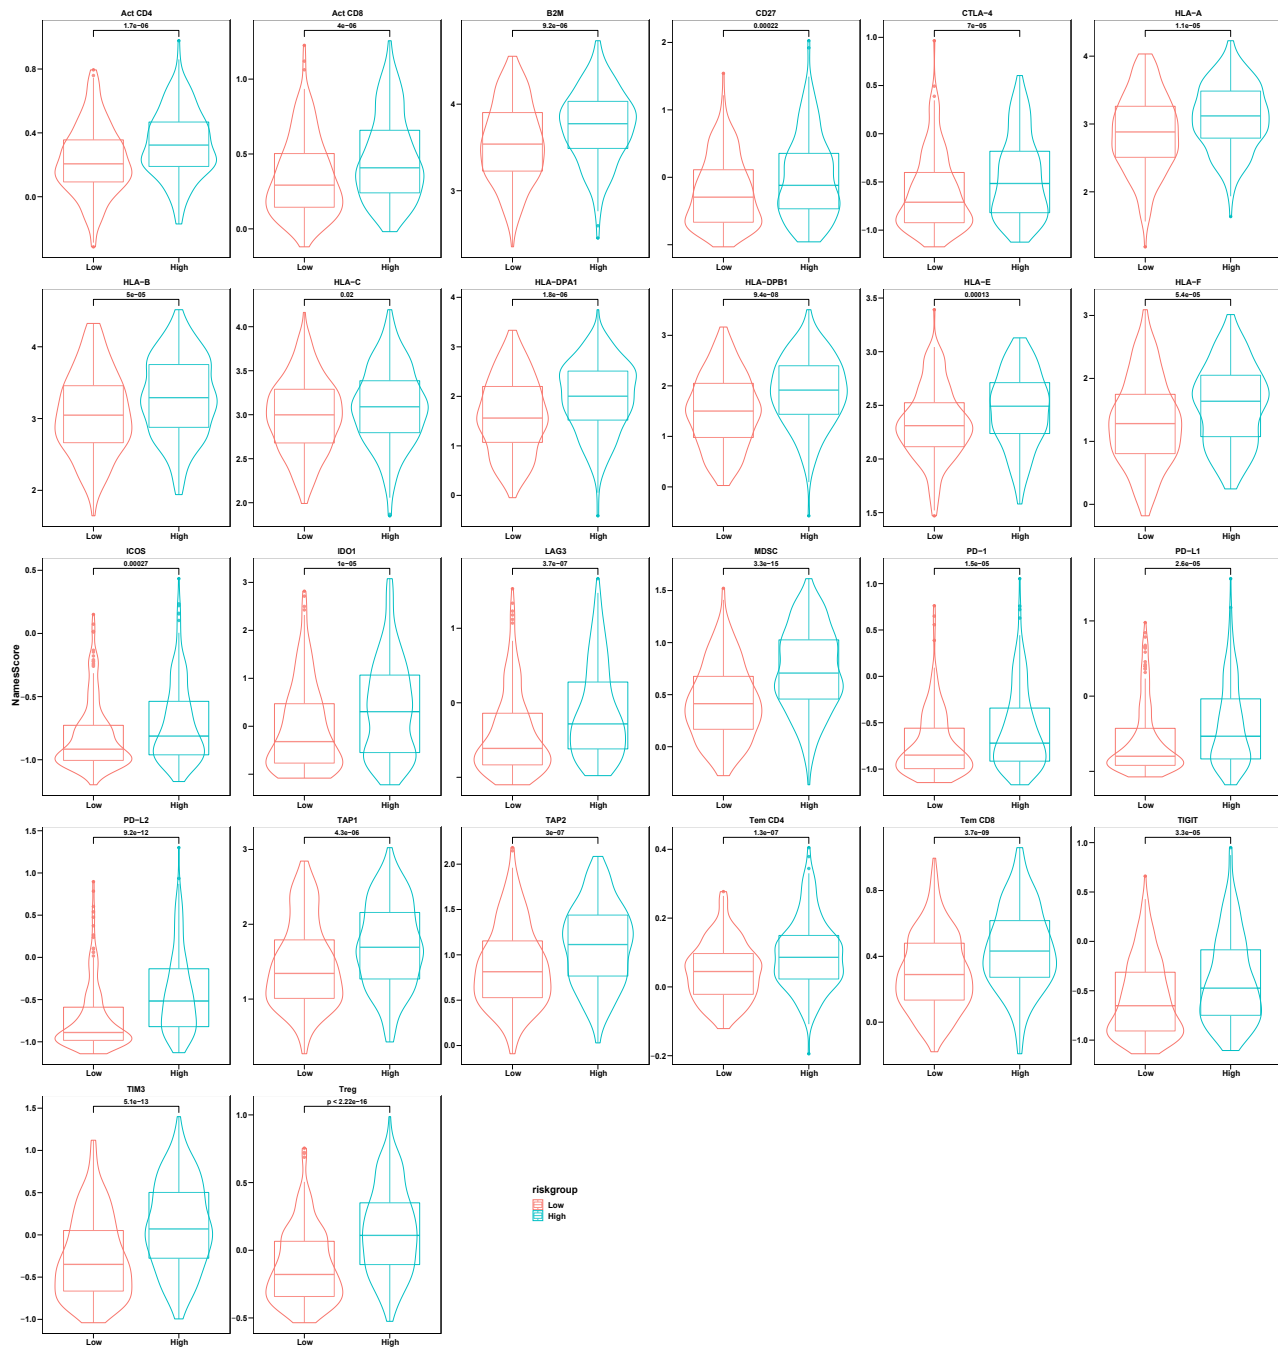

Supplement: MOESM1 [file 23654114]
